# Supplementary material
Source: PubMed Central journal article supplement (PMC8088061)
Supplement: 12874_2021_1291_MOESM1_ESM.pdf [file 12874_2021_1291_MOESM1_ESM.pdf]

**Supplementary Table S1.** Extraction from clinical trial database

**INTERVENTIONAL TRIALS  
PROMOTED BY IRST IRCCS**

**with ACTIVE ENROLLMENT in the period 11/03/2020-30/06/2020**

**with ACTIVE ENROLLMENT in the period 11/03/19-30/06/19**

**with patients in treatment/follow-up at 11/03/2020**

|                                  |                                                                                    |
|----------------------------------|------------------------------------------------------------------------------------|
| <input type="radio"/>            | <b>IRST100.11 LUNET – EudraCT n°2013-003165-34</b> Enrollment closed on 20/03/2019 |
| ▶ <input type="radio"/>          | IRCCS IRST                                                                         |
| <input checked="" type="radio"/> | <b>IRST100.17 LUCAS – EudraCT n°2014-003067-38</b> Enrollment closed on 28/08/2019 |
| ▶ <input type="radio"/>          | IRCCS IRST                                                                         |
| <input checked="" type="radio"/> | <b>IRST100.22 SENECA – EudraCT n°2016-000767-17</b>                                |
| ▶ <input type="radio"/>          | AOU Careggi                                                                        |
| ▶ <input type="radio"/>          | AOU - Ospedali Riuniti Umberto I – G.M. Lancisi – G. Salesi - ANCONA               |
| ▶ <input type="radio"/>          | AOU Pisana                                                                         |
| ▶ <input type="radio"/>          | AOU Policlinico di Bari                                                            |
| ▶ <input type="radio"/>          | AOU POLICLINICO MODENA                                                             |
| ▶ <input type="radio"/>          | AOU San Luigi Gonzaga                                                              |
| ▶ <input type="radio"/>          | ASST Spedali Civili di Brescia                                                     |
| ▶ <input type="radio"/>          | Azienda Ospedaliera Universitaria di Parma                                         |
| ▶ <input type="radio"/>          | Azienda Ospedaliera Universitaria Policlinico "Paolo Giaccone"                     |
| ▶ <input type="radio"/>          | Az.osp.universitaria integrata Verona-Borgo Roma                                   |
| ▶ <input type="radio"/>          | BARI IRCCS GPII                                                                    |
| ▶ <input type="radio"/>          | Castellana Grotte                                                                  |
| ▶ <input type="radio"/>          | Faenza                                                                             |
| ▶ <input type="radio"/>          | IRCCS - C.R.O. Centro di Riferimento Oncologico di Aviano                          |
| ▶ <input type="radio"/>          | IRCCS IRST                                                                         |
| ▶ <input type="radio"/>          | Istituto Nazionale Tumori Milano                                                   |
| ▶ <input type="radio"/>          | Istituto Oncologico Veneto                                                         |
| ▶ <input type="radio"/>          | Milano - IEO                                                                       |
| ▶ <input type="radio"/>          | Ospedale di Bolzano                                                                |
| ▶ <input type="radio"/>          | Ospedale di Feltre                                                                 |

|                       |                       |                                                                                             |
|-----------------------|-----------------------|---------------------------------------------------------------------------------------------|
| <input type="radio"/> | <input type="radio"/> | Ospedale S. Orsola - Malpighi                                                               |
| <input type="radio"/> | <input type="radio"/> | Ospedale Vito Fazzi Lecce                                                                   |
| <input type="radio"/> | <input type="radio"/> | Università Campus Bio-Medico Roma                                                           |
| <input type="radio"/> |                       | <b>IRST 100.26 LUTHREE – EudraCT n°2015-004727-31</b>                                       |
| <input type="radio"/> | <input type="radio"/> | IRCCS IRST                                                                                  |
| <input type="radio"/> |                       | <b>IRST100.39 MESOVAX – EudraCT n°2018-000500-42</b>                                        |
| <input type="radio"/> | <input type="radio"/> | IRCCS IRST                                                                                  |
| <input type="radio"/> |                       | <b>IRST100.42 RAC-AD – EudraCT n°2019-000793-27</b>                                         |
| <input type="radio"/> | <input type="radio"/> | IRCCS IRST                                                                                  |
| <input type="radio"/> |                       | <b>IRST153.04 COREVAX-1 – EudraCT n°2015-000894-11</b>                                      |
| <input type="radio"/> | <input type="radio"/> | IRCCS IRST                                                                                  |
| <input type="radio"/> |                       | <b>IRST154.01 COLORE – EudraCT n°2013-000770-30 Enrollment closed on 25/05/2017</b>         |
| <input type="radio"/> | <input type="radio"/> | IRCCS IRST                                                                                  |
| <input type="radio"/> |                       | Ravenna                                                                                     |
| <input type="radio"/> |                       | <b>IRST163.01 MESORT (interventional with RT)</b>                                           |
| <input type="radio"/> | <input type="radio"/> | IRCCS IRST                                                                                  |
| <input type="radio"/> |                       | <b>IRST172.02 ABSIDE – EudraCT n°2012-001410-41</b>                                         |
| <input type="radio"/> | <input type="radio"/> | IRCCS IRST                                                                                  |
| <input type="radio"/> |                       | <b>IRST172.03 IL2HD – EudraCT n°2012-001786-32</b>                                          |
| <input type="radio"/> | <input type="radio"/> | IRCCS IRST                                                                                  |
| <input type="radio"/> |                       | <b>IRST172.04 ACDC – EudraCT n°2014-005123-27 Enrollment and Study closed on 25/11/2019</b> |
| <input type="radio"/> | <input type="radio"/> | IRCCS IRST                                                                                  |
| <input type="radio"/> |                       | <b>IRST174.09 met-HEReMYTA – EudraCT n°2014-002602-20 Enrollment closed on 23/05/2018</b>   |
| <input type="radio"/> | <input type="radio"/> | Ferrara                                                                                     |
| <input type="radio"/> | <input type="radio"/> | Imola                                                                                       |
| <input type="radio"/> | <input type="radio"/> | IRCCS IRST                                                                                  |
| <input type="radio"/> | <input type="radio"/> | Modena                                                                                      |
| <input type="radio"/> | <input type="radio"/> | Parma                                                                                       |
| <input type="radio"/> | <input type="radio"/> | Piacenza                                                                                    |
| <input type="radio"/> | <input type="radio"/> | Rimini-Cattolica                                                                            |
| <input type="radio"/> |                       | <b>IRST174.19 KENDO – EudraCT n°2016-004107-31</b>                                          |

|                                                                              |
|------------------------------------------------------------------------------|
| <input type="checkbox"/> ▶ <input type="radio"/> Ancona                      |
| <input type="checkbox"/> ▶ <input type="radio"/> Bari (CLOSED)               |
| <input type="checkbox"/> ▶ <input type="radio"/> Bologna                     |
| <input type="checkbox"/> ▶ <input type="radio"/> Carpi                       |
| <input type="checkbox"/> ▶ <input type="radio"/> Cremona                     |
| <input type="checkbox"/> ▶ <input type="radio"/> Ferrara                     |
| <input type="checkbox"/> ▶ <input type="radio"/> Guastalla                   |
| <input type="checkbox"/> ▶ <input type="radio"/> IRCCS IRST                  |
| <input type="checkbox"/> ▶ <input type="radio"/> Legnago                     |
| <input type="checkbox"/> ▶ <input type="radio"/> Macerata                    |
| <input type="checkbox"/> ▶ <input type="radio"/> Novara                      |
| <input type="checkbox"/> ▶ <input type="radio"/> Parma                       |
| <input type="checkbox"/> ▶ <input type="radio"/> Piacenza                    |
| <input type="checkbox"/> ▶ <input type="radio"/> Ravenna                     |
| <input type="checkbox"/> ▶ <input type="radio"/> Reggio Emilia               |
| <input type="checkbox"/> ▶ <input type="radio"/> Rimini                      |
| <input type="checkbox"/> ▶ <input type="radio"/> Sondrio                     |
| <input type="checkbox"/> <b>IRST185.03 LUPSMA – EudraCT n°2016-002732-32</b> |
| <input type="checkbox"/> ▶ <input type="radio"/> IRCCS IRST                  |
| <input type="checkbox"/> <b>IRST185.04 RAPSON- EudraCT n°2016-004452-29</b>  |
| <input type="checkbox"/> ▶ <input type="radio"/> Aviano                      |
| <input type="checkbox"/> ▶ <input type="radio"/> Bolzano                     |
| <input type="checkbox"/> ▶ <input type="radio"/> IRCCS IRST                  |
| <input type="checkbox"/> ▶ <input type="radio"/> Lecce                       |
| <input type="checkbox"/> ▶ <input type="radio"/> Napoli (CLOSED)             |
| <input type="checkbox"/> ▶ <input type="radio"/> Negrar                      |
| <input type="checkbox"/> ▶ <input type="radio"/> Orbassano                   |
| <input type="checkbox"/> ▶ <input type="radio"/> Parma                       |
| <input type="checkbox"/> ▶ <input type="radio"/> Pisa                        |
| <input type="checkbox"/> ▶ <input type="radio"/> Reggio Emilia               |
| <input type="checkbox"/> ▶ <input type="radio"/> Rionero in Vulture          |

|                                                                                                                     |
|---------------------------------------------------------------------------------------------------------------------|
| ▶ <input type="radio"/> Trento                                                                                      |
| <input type="radio"/> <b>IRST185.06 THRIP (interventional with RT) Enrollment temporary suspended on 23/03/2020</b> |
| ▶ <input type="radio"/> IRCCS IRST                                                                                  |
| <input type="radio"/> <b>IRST186.02 OLAPARIB – eudraCT n°2014-005095-28 Enrollment closed on 18/02/2019</b>         |
| ▶ <input type="radio"/> IRCCS IRST                                                                                  |
| ▶ <input type="radio"/> Napoli                                                                                      |
| <input type="radio"/> <b>IRST191.02 HBO-RT (interventional with DM + RT)</b>                                        |
| ▶ <input type="radio"/> IRCCS IRST                                                                                  |
| <input type="radio"/> <b>IRST198.01 HIFU-BONE (interventional with DM) Enrollment closed on 05/12/2018</b>          |
| ▶ <input type="radio"/> IRCCS IRST                                                                                  |

\*\*\*\*\*

Study Name: IRST100.11 LUNET

Protocol ID: LUNET

Date: 2020-Oct-04

Subjects: 68

Study Event

Definitions 1

Study Event

Definition 1 RANDOMIZATION E1

RANDOMIZATION [LUNET] -

CRF1 LUNET 1.0 C1

Study Subject

ID Protocol ID RNDpLUNET007\_E1\_C1

100.11\_001 LUNET - MELD\_100.11 25/02/2014

100.11\_003 LUNET - MELD\_100.11 12/05/2014

100.11\_004 LUNET - MELD\_100.11 12/05/2014

100.11\_007 LUNET - MELD\_100.11 10/06/2014

100.11\_005 LUNET - MELD\_100.11 10/06/2014

100.11\_006 LUNET - MELD\_100.11 10/06/2014

100.11\_008 LUNET - MELD\_100.11 10/06/2014

100.11\_009 LUNET - MELD\_100.11 25/07/2014

100.11\_010 LUNET - MELD\_100.11 05/08/2014

100.11\_011 LUNET - MELD\_100.11 08/09/2014

100.11\_012 LUNET - MELD\_100.11 23/09/2014

100.11\_013 LUNET - MELD\_100.11 06/11/2014

100.11\_014 LUNET - MELD\_100.11 20/11/2014

100.11\_015 LUNET - MELD\_100.11 02/12/2014

100.11\_016 LUNET - MELD\_100.11 12/01/2015

100.11\_017 LUNET - MELD\_100.11 21/01/2015

100.11\_018 LUNET - MELD\_100.11 02/02/2015

100.11\_019 LUNET - MELD\_100.11 02/02/2015

|            |                     |            |
|------------|---------------------|------------|
| 100.11_020 | LUNET - MELD_100.11 | 27/02/2015 |
| 100.11_021 | LUNET - MELD_100.11 | 20/04/2015 |
| 100.11_022 | LUNET - MELD_100.11 | 21/04/2015 |
| 100.11_023 | LUNET - MELD_100.11 | 08/05/2015 |
| 100.11_024 | LUNET - MELD_100.11 | 31/07/2015 |
| 100.11_025 | LUNET - MELD_100.11 | 31/07/2015 |
| 100.11_026 | LUNET - MELD_100.11 | 13/08/2015 |
| 100.11_027 | LUNET - MELD_100.11 | 16/09/2015 |
| 100.11_028 | LUNET - MELD_100.11 | 25/09/2015 |
| 100.11_029 | LUNET - MELD_100.11 | 28/10/2015 |
| 100.11_030 | LUNET - MELD_100.11 | 09/11/2015 |
| 100.11_031 | LUNET - MELD_100.11 | 16/11/2015 |
| 100.11_032 | LUNET - MELD_100.11 | 24/12/2015 |
| 100.11_033 | LUNET - MELD_100.11 | 29/12/2015 |
| 100.11_034 | LUNET - MELD_100.11 | 15/01/2016 |
| 100.11_035 | LUNET - MELD_100.11 | 17/02/2016 |
| 100.11_036 | LUNET - MELD_100.11 | 01/03/2016 |
| 100.11_038 | LUNET - MELD_100.11 | 18/03/2016 |
| 100.11_039 | LUNET - MELD_100.11 | 12/04/2016 |
| 100.11_040 | LUNET - MELD_100.11 | 19/04/2016 |
| 100.11_041 | LUNET - MELD_100.11 | 19/04/2016 |
| 100.11_042 | LUNET - MELD_100.11 | 26/05/2016 |
| 100.11_043 | LUNET - MELD_100.11 | 30/05/2016 |
| 100.11_044 | LUNET - MELD_100.11 | 23/06/2016 |
| 100.11_045 | LUNET - MELD_100.11 | 23/06/2016 |
| 100.11_046 | LUNET - MELD_100.11 | 20/09/2016 |
| 100.11_047 | LUNET - MELD_100.11 | 18/01/2017 |
| 100.11_048 | LUNET - MELD_100.11 | 24/01/2017 |
| 100.11_049 | LUNET - MELD_100.11 | 02/02/2017 |
| 100.11_050 | LUNET - MELD_100.11 | 08/02/2017 |
| 100.11_051 | LUNET - MELD_100.11 | 01/03/2017 |
| 100.11_052 | LUNET - MELD_100.11 | 14/03/2017 |

|            |                     |            |
|------------|---------------------|------------|
| 100.11_053 | LUNET - MELD_100.11 | 12/04/2017 |
| 100.11_054 | LUNET - MELD_100.11 | 18/05/2017 |
| 100.11_055 | LUNET - MELD_100.11 | 24/05/2017 |
| 100.11_056 | LUNET - MELD_100.11 | 30/08/2017 |
| 100.11_057 | LUNET - MELD_100.11 | 24/11/2017 |
| 100.11_058 | LUNET - MELD_100.11 | 24/11/2017 |
| 100.11_059 | LUNET - MELD_100.11 | 14/02/2018 |
| 100.11_060 | LUNET - MELD_100.11 | 08/03/2018 |
| 100.11_061 | LUNET - MELD_100.11 | 19/04/2018 |
| 100.11_062 | LUNET - MELD_100.11 | 31/05/2018 |
| 100.11_063 | LUNET - MELD_100.11 | 01/06/2018 |
| 100.11_064 | LUNET - MELD_100.11 | 13/06/2018 |
| 100.11_065 | LUNET - MELD_100.11 | 10/07/2018 |
| 100.11_066 | LUNET - MELD_100.11 | 12/10/2018 |
| 100.11_067 | LUNET - MELD_100.11 | 07/11/2018 |
| 100.11_068 | LUNET - MELD_100.11 | 15/01/2019 |
| 100.11_069 | LUNET - MELD_100.11 | 12/02/2019 |
| 100.11_070 | LUNET - MELD_100.11 | 20/03/2019 |

Total patients enrolled at 11/03/2020: 68

Total patients enrolled 11/03/2019-30/06/2019: 1

Total patients enrolled 11/03/2020-30/06/2020: 0

\*\*\*\*\*

Study Name: IRST100.17 LUCAS

Protocol ID: LUCAS

Date: 2020-Oct-04

Subjects: 33

Study Event

Definitions 1

Study Event

Definition 1 Randomization

CRF1

RANDOMIZATION [LUCAS] - LUCAS 1.0

| Study Subject ID | Protocol ID | RNDpPATIENTINFO_010_E1_C1 |
|------------------|-------------|---------------------------|
|                  | LUCAS -     |                           |
| 100.17_001       | MELD_100.17 | 11/11/2016                |
|                  | LUCAS -     |                           |
| 100.17_003       | MELD_100.17 | 22/12/2016                |
|                  | LUCAS -     |                           |
| 100.17_004       | MELD_100.17 | 17/01/2017                |
|                  | LUCAS -     |                           |
| 100.17_005       | MELD_100.17 | 17/01/2017                |
|                  | LUCAS -     |                           |
| 100.17_006       | MELD_100.17 | 18/01/2017                |
|                  | LUCAS -     |                           |
| 100.17_007       | MELD_100.17 | 26/01/2017                |
|                  | LUCAS -     |                           |
| 100.17_009       | MELD_100.17 | 31/01/2017                |
|                  | LUCAS -     |                           |
| 100.17_008       | MELD_100.17 | 31/01/2017                |
|                  | LUCAS -     |                           |
| 100.17_011       | MELD_100.17 | 12/04/2017                |
|                  | LUCAS -     |                           |
| 100.17_012       | MELD_100.17 | 10/05/2017                |
|                  | LUCAS -     |                           |
| 100.17_013       | MELD_100.17 | 24/05/2017                |
|                  | LUCAS -     |                           |
| 100.17_014       | MELD_100.17 | 14/06/2017                |
|                  | LUCAS -     |                           |
| 100.17_015       | MELD_100.17 | 14/06/2017                |
|                  | LUCAS -     |                           |
| 100.17_016       | MELD_100.17 | 29/06/2017                |
| 100.17_017       | LUCAS -     | 24/08/2017                |



|            |             |            |
|------------|-------------|------------|
|            | MELD_100.17 |            |
|            | LUCAS -     |            |
| 100.17_018 | MELD_100.17 | 16/11/2017 |
|            | LUCAS -     |            |
| 100.17_019 | MELD_100.17 | 07/03/2018 |
|            | LUCAS -     |            |
| 100.17_020 | MELD_100.17 | 19/03/2018 |
|            | LUCAS -     |            |
| 100.17_021 | MELD_100.17 | 29/03/2018 |
|            | LUCAS -     |            |
| 100.17_022 | MELD_100.17 | 13/04/2018 |
|            | LUCAS -     |            |
| 100.17_023 | MELD_100.17 | 27/04/2018 |
|            | LUCAS -     |            |
| 100.17_024 | MELD_100.17 | 31/05/2018 |
|            | LUCAS -     |            |
| 100.17_025 | MELD_100.17 | 16/08/2018 |
|            | LUCAS -     |            |
| 100.17_026 | MELD_100.17 | 28/09/2018 |
|            | LUCAS -     |            |
| 100.17_027 | MELD_100.17 | 08/10/2018 |
|            | LUCAS -     |            |
| 100.17_028 | MELD_100.17 | 28/12/2018 |
|            | LUCAS -     |            |
| 100.17_029 | MELD_100.17 | 15/01/2019 |
|            | LUCAS -     |            |
| 100.17_030 | MELD_100.17 | 07/02/2019 |
|            | LUCAS -     |            |
| 100.17_031 | MELD_100.17 | 19/02/2019 |
|            | LUCAS -     |            |
| 100.17_032 | MELD_100.17 | 20/03/2019 |
| 100.17_033 | LUCAS -     | 19/04/2019 |

|            |             |            |
|------------|-------------|------------|
|            | MELD_100.17 |            |
|            | LUCAS -     |            |
| 100.17_034 | MELD_100.17 | 08/08/2019 |
|            | LUCAS -     |            |
| 100.17_035 | MELD_100.17 | 28/08/2019 |

Total patients enrolled at 11/03/2020: 33

Total patients enrolled 11/03/2019-30/06/2019: 3

Total patients enrolled 11/03/2020-30/06/2020: 0

\*\*\*\*\*

Study Name: IRST100.22 SENECA

Protocol ID: SENECA

Date: 2020-Aug-31

Subjects: 21

Study Event Definitions 1

Study Event Definition 2 Randomization E2

CRF12 RANDOMIZATION [SENECA] - SENECA 1.0 C12

Study

Subject

| ID         | Protocol ID          | RNDrRND06_E2_C12 |
|------------|----------------------|------------------|
| 100.22_001 | SENECA - MELD_100.22 | 06/03/2017       |
| 100.22_002 | SENECA - MELD_100.22 | 06/03/2017       |
| 100.22_004 | SENECA - MELD_100.22 | 22/05/2017       |
| 100.22_003 | SENECA - MILA_100.22 | 22/05/2017       |
| 100.22_005 | SENECA - MELD_100.22 | 05/07/2017       |
| 100.22_006 | SENECA - MILA_100.22 | 05/10/2017       |
| 100.22_008 | SENECA - BOLZ_100.22 | 13/11/2017       |
| 100.22_009 | SENECA - PARM_100.22 | 23/11/2017       |
| 100.22_011 | SENECA - LECC_100.22 | 02/02/2018       |
| 100.22_012 | SENECA - ANCO_100.22 | 09/02/2018       |

|            |                      |              |
|------------|----------------------|--------------|
| 100.22_014 | SENECA - FAEN_100.22 | 15/02/2018   |
| 100.22_015 | SENECA - LECC_100.22 | 30/03/2018   |
| 100.22_016 | SENECA - MODE_100.22 | 05/04/2018   |
| 100.22_018 | SENECA - MELD_100.22 | 14/05/2018   |
| 100.22_019 | SENECA - CGRO_100.22 | 14/05/2018   |
| 100.22_020 | SENECA - PADO_100.22 | 08/06/2018   |
| 100.22_021 | SENECA - PADO_100.22 | 12/06/2018   |
| 100.22_022 | SENECA - LECC_100.22 | 02/07/2018   |
| 100.22_023 | SENECA - MELD_100.22 | 04/07/2018   |
| 100.22_024 | SENECA - FAEN_100.22 | 16/07/2018   |
| 100.22_025 | SENECA - PISA_100.22 | 19/07/2018   |
| 100.22_026 | SENECA - PADO_100.22 | 24/08/2018   |
| 100.22_027 | SENECA - MILA_100.22 | 06/11/2018   |
| 100.22_028 | SENECA - ROMA_100.22 | 05/12/2018   |
| 100.22_029 | SENECA - MELD_100.22 | 27/12/2018   |
| 100.22_030 | SENECA - MELD_100.22 | 27/02/2019   |
| 100.22_031 | SENECA - MELD_100.22 | 09/04/2019   |
| 100.22_046 | SENECA - MIEO_100.22 | 1 16/03/2020 |
| 100.22_047 | SENECA - PADO_100.22 | 25/05/2020   |
| 100.22_051 | SENECA - MELD_100.22 | 12/06/2020   |
| 100.22_052 | SENECA - MIEO_100.22 | 1 18/06/2020 |

Total patients enrolled at 11/03/2020: 28

Total patients enrolled 11/03/2019-30/06/2019: 1

Total patients enrolled 11/03/2020-30/06/2020: 4

\*\*\*\*\*

Study Name: IRST100.26 LUTHREE  
Protocol ID: LUTHREE  
Date: 2020-Oct-04  
Subjects: 370  
Study Event  
Definitions 1

Study Event

|              |                           |    |
|--------------|---------------------------|----|
| Definition 1 | Randomization             | E1 |
|              | RANDOMIZATION [LUTHREE] - |    |
| CRF1         | LUTHREE 1.0               | C1 |

| Study Subject ID | Protocol ID           | RNDpPATINFO0009_E1_C1 |
|------------------|-----------------------|-----------------------|
| 100.26_001       | LUTHREE - MELD_100.26 | 26/05/2016            |
| 100.26_002       | LUTHREE - MELD_100.26 | 26/05/2016            |
| 100.26_003       | LUTHREE - MELD_100.26 | 26/05/2016            |
| 100.26_004       | LUTHREE - MELD_100.26 | 01/06/2016            |
| 100.26_005       | LUTHREE - MELD_100.26 | 06/09/2016            |
| 100.26_006       | LUTHREE - MELD_100.26 | 07/09/2016            |
| 100.26_007       | LUTHREE - MELD_100.26 | 07/09/2016            |
| 100.26_008       | LUTHREE - MELD_100.26 | 14/09/2016            |
| 100.26_009       | LUTHREE - MELD_100.26 | 20/09/2016            |
| 100.26_010       | LUTHREE - MELD_100.26 | 21/09/2016            |
| 100.26_011       | LUTHREE - MELD_100.26 | 21/09/2016            |
| 100.26_012       | LUTHREE - MELD_100.26 | 03/10/2016            |
| 100.26_013       | LUTHREE - MELD_100.26 | 05/10/2016            |
| 100.26_014       | LUTHREE - MELD_100.26 | 05/10/2016            |
| 100.26_016       | LUTHREE - MELD_100.26 | 12/10/2016            |
| 100.26_015       | LUTHREE - MELD_100.26 | 12/10/2016            |
| 100.26_018       | LUTHREE - MELD_100.26 | 13/10/2016            |
| 100.26_017       | LUTHREE - MELD_100.26 | 13/10/2016            |
| 100.26_019       | LUTHREE - MELD_100.26 | 26/10/2016            |
| 100.26_020       | LUTHREE - MELD_100.26 | 26/10/2016            |
| 100.26_024       | LUTHREE - MELD_100.26 | 03/11/2016            |
| 100.26_023       | LUTHREE - MELD_100.26 | 03/11/2016            |
| 100.26_022       | LUTHREE - MELD_100.26 | 03/11/2016            |
| 100.26_021       | LUTHREE - MELD_100.26 | 03/11/2016            |
| 100.26_025       | LUTHREE - MELD_100.26 | 11/11/2016            |

|            |                       |            |
|------------|-----------------------|------------|
| 100.26_026 | LUTHREE - MELD_100.26 | 03/01/2017 |
| 100.26_027 | LUTHREE - MELD_100.26 | 05/01/2017 |
| 100.26_029 | LUTHREE - MELD_100.26 | 10/01/2017 |
| 100.26_028 | LUTHREE - MELD_100.26 | 10/01/2017 |
| 100.26_030 | LUTHREE - MELD_100.26 | 10/01/2017 |
| 100.26_031 | LUTHREE - MELD_100.26 | 10/01/2017 |
| 100.26_032 | LUTHREE - MELD_100.26 | 10/01/2017 |
| 100.26_033 | LUTHREE - MELD_100.26 | 13/01/2017 |
| 100.26_036 | LUTHREE - MELD_100.26 | 24/01/2017 |
| 100.26_039 | LUTHREE - MELD_100.26 | 24/01/2017 |
| 100.26_038 | LUTHREE - MELD_100.26 | 24/01/2017 |
| 100.26_034 | LUTHREE - MELD_100.26 | 24/01/2017 |
| 100.26_037 | LUTHREE - MELD_100.26 | 24/01/2017 |
| 100.26_035 | LUTHREE - MELD_100.26 | 24/01/2017 |
| 100.26_040 | LUTHREE - MELD_100.26 | 26/01/2017 |
| 100.26_041 | LUTHREE - MELD_100.26 | 26/01/2017 |
| 100.26_042 | LUTHREE - MELD_100.26 | 31/01/2017 |
| 100.26_043 | LUTHREE - MELD_100.26 | 06/02/2017 |
| 100.26_044 | LUTHREE - MELD_100.26 | 08/02/2017 |
| 100.26_045 | LUTHREE - MELD_100.26 | 17/02/2017 |
| 100.26_046 | LUTHREE - MELD_100.26 | 17/02/2017 |
| 100.26_048 | LUTHREE - MELD_100.26 | 24/02/2017 |
| 100.26_049 | LUTHREE - MELD_100.26 | 24/02/2017 |
| 100.26_047 | LUTHREE - MELD_100.26 | 24/02/2017 |
| 100.26_050 | LUTHREE - MELD_100.26 | 01/03/2017 |
| 100.26_051 | LUTHREE - MELD_100.26 | 15/03/2017 |
| 100.26_052 | LUTHREE - MELD_100.26 | 15/03/2017 |
| 100.26_055 | LUTHREE - MELD_100.26 | 31/03/2017 |
| 100.26_053 | LUTHREE - MELD_100.26 | 31/03/2017 |
| 100.26_054 | LUTHREE - MELD_100.26 | 31/03/2017 |
| 100.26_056 | LUTHREE - MELD_100.26 | 12/04/2017 |
| 100.26_058 | LUTHREE - MELD_100.26 | 27/04/2017 |

|            |                       |            |
|------------|-----------------------|------------|
| 100.26_057 | LUTHREE - MELD_100.26 | 27/04/2017 |
| 100.26_059 | LUTHREE - MELD_100.26 | 09/05/2017 |
| 100.26_060 | LUTHREE - MELD_100.26 | 15/05/2017 |
| 100.26_061 | LUTHREE - MELD_100.26 | 15/05/2017 |
| 100.26_062 | LUTHREE - MELD_100.26 | 15/05/2017 |
| 100.26_063 | LUTHREE - MELD_100.26 | 19/05/2017 |
| 100.26_064 | LUTHREE - MELD_100.26 | 19/05/2017 |
| 100.26_065 | LUTHREE - MELD_100.26 | 19/05/2017 |
| 100.26_066 | LUTHREE - MELD_100.26 | 24/05/2017 |
| 100.26_067 | LUTHREE - MELD_100.26 | 09/06/2017 |
| 100.26_068 | LUTHREE - MELD_100.26 | 09/06/2017 |
| 100.26_069 | LUTHREE - MELD_100.26 | 09/06/2017 |
| 100.26_070 | LUTHREE - MELD_100.26 | 14/06/2017 |
| 100.26_071 | LUTHREE - MELD_100.26 | 14/06/2017 |
| 100.26_072 | LUTHREE - MELD_100.26 | 14/06/2017 |
| 100.26_073 | LUTHREE - MELD_100.26 | 29/06/2017 |
| 100.26_074 | LUTHREE - MELD_100.26 | 29/06/2017 |
| 100.26_075 | LUTHREE - MELD_100.26 | 06/07/2017 |
| 100.26_076 | LUTHREE - MELD_100.26 | 21/07/2017 |
| 100.26_077 | LUTHREE - MELD_100.26 | 21/07/2017 |
| 100.26_078 | LUTHREE - MELD_100.26 | 31/07/2017 |
| 100.26_079 | LUTHREE - MELD_100.26 | 02/08/2017 |
| 100.26_080 | LUTHREE - MELD_100.26 | 24/08/2017 |
| 100.26_081 | LUTHREE - MELD_100.26 | 24/08/2017 |
| 100.26_082 | LUTHREE - MELD_100.26 | 24/08/2017 |
| 100.26_083 | LUTHREE - MELD_100.26 | 28/08/2017 |
| 100.26_084 | LUTHREE - MELD_100.26 | 30/08/2017 |
| 100.26_085 | LUTHREE - MELD_100.26 | 06/09/2017 |
| 100.26_086 | LUTHREE - MELD_100.26 | 08/09/2017 |
| 100.26_087 | LUTHREE - MELD_100.26 | 08/09/2017 |
| 100.26_088 | LUTHREE - MELD_100.26 | 20/09/2017 |
| 100.26_089 | LUTHREE - MELD_100.26 | 20/09/2017 |

|            |                       |            |
|------------|-----------------------|------------|
| 100.26_090 | LUTHREE - MELD_100.26 | 20/09/2017 |
| 100.26_091 | LUTHREE - MELD_100.26 | 02/10/2017 |
| 100.26_092 | LUTHREE - MELD_100.26 | 02/10/2017 |
| 100.26_093 | LUTHREE - MELD_100.26 | 02/10/2017 |
| 100.26_094 | LUTHREE - MELD_100.26 | 02/10/2017 |
| 100.26_095 | LUTHREE - MELD_100.26 | 02/10/2017 |
| 100.26_096 | LUTHREE - MELD_100.26 | 02/10/2017 |
| 100.26_097 | LUTHREE - MELD_100.26 | 13/10/2017 |
| 100.26_098 | LUTHREE - MELD_100.26 | 13/10/2017 |
| 100.26_099 | LUTHREE - MELD_100.26 | 13/10/2017 |
| 100.26_100 | LUTHREE - MELD_100.26 | 13/10/2017 |
| 100.26_101 | LUTHREE - MELD_100.26 | 13/10/2017 |
| 100.26_102 | LUTHREE - MELD_100.26 | 20/10/2017 |
| 100.26_103 | LUTHREE - MELD_100.26 | 24/10/2017 |
| 100.26_104 | LUTHREE - MELD_100.26 | 24/10/2017 |
| 100.26_105 | LUTHREE - MELD_100.26 | 26/10/2017 |
| 100.26_106 | LUTHREE - MELD_100.26 | 26/10/2017 |
| 100.26_107 | LUTHREE - MELD_100.26 | 26/10/2017 |
| 100.26_108 | LUTHREE - MELD_100.26 | 03/11/2017 |
| 100.26_109 | LUTHREE - MELD_100.26 | 06/11/2017 |
| 100.26_110 | LUTHREE - MELD_100.26 | 08/11/2017 |
| 100.26_111 | LUTHREE - MELD_100.26 | 10/11/2017 |
| 100.26_112 | LUTHREE - MELD_100.26 | 13/11/2017 |
| 100.26_113 | LUTHREE - MELD_100.26 | 13/11/2017 |
| 100.26_114 | LUTHREE - MELD_100.26 | 13/11/2017 |
| 100.26_115 | LUTHREE - MELD_100.26 | 05/12/2017 |
| 100.26_116 | LUTHREE - MELD_100.26 | 18/12/2017 |
| 100.26_117 | LUTHREE - MELD_100.26 | 20/12/2017 |
| 100.26_118 | LUTHREE - MELD_100.26 | 21/12/2017 |
| 100.26_119 | LUTHREE - MELD_100.26 | 28/12/2017 |
| 100.26_120 | LUTHREE - MELD_100.26 | 03/01/2018 |
| 100.26_121 | LUTHREE - MELD_100.26 | 04/01/2018 |

|            |                       |            |
|------------|-----------------------|------------|
| 100.26_122 | LUTHREE - MELD_100.26 | 10/01/2018 |
| 100.26_123 | LUTHREE - MELD_100.26 | 16/01/2018 |
| 100.26_124 | LUTHREE - MELD_100.26 | 23/01/2018 |
| 100.26_125 | LUTHREE - MELD_100.26 | 01/02/2018 |
| 100.26_126 | LUTHREE - MELD_100.26 | 01/02/2018 |
| 100.26_127 | LUTHREE - MELD_100.26 | 01/02/2018 |
| 100.26_128 | LUTHREE - MELD_100.26 | 01/02/2018 |
| 100.26_129 | LUTHREE - MELD_100.26 | 07/02/2018 |
| 100.26_130 | LUTHREE - MELD_100.26 | 07/02/2018 |
| 100.26_131 | LUTHREE - MELD_100.26 | 14/02/2018 |
| 100.26_132 | LUTHREE - MELD_100.26 | 14/02/2018 |
| 100.26_133 | LUTHREE - MELD_100.26 | 14/02/2018 |
| 100.26_134 | LUTHREE - MELD_100.26 | 07/03/2018 |
| 100.26_135 | LUTHREE - MELD_100.26 | 07/03/2018 |
| 100.26_136 | LUTHREE - MELD_100.26 | 07/03/2018 |
| 100.26_137 | LUTHREE - MELD_100.26 | 07/03/2018 |
| 100.26_138 | LUTHREE - MELD_100.26 | 07/03/2018 |
| 100.26_139 | LUTHREE - MELD_100.26 | 07/03/2018 |
| 100.26_140 | LUTHREE - MELD_100.26 | 16/03/2018 |
| 100.26_141 | LUTHREE - MELD_100.26 | 19/03/2018 |
| 100.26_142 | LUTHREE - MELD_100.26 | 19/03/2018 |
| 100.26_143 | LUTHREE - MELD_100.26 | 19/03/2018 |
| 100.26_144 | LUTHREE - MELD_100.26 | 23/03/2018 |
| 100.26_145 | LUTHREE - MELD_100.26 | 29/03/2018 |
| 100.26_146 | LUTHREE - MELD_100.26 | 29/03/2018 |
| 100.26_147 | LUTHREE - MELD_100.26 | 10/04/2018 |
| 100.26_148 | LUTHREE - MELD_100.26 | 19/04/2018 |
| 100.26_149 | LUTHREE - MELD_100.26 | 19/04/2018 |
| 100.26_150 | LUTHREE - MELD_100.26 | 19/04/2018 |
| 100.26_151 | LUTHREE - MELD_100.26 | 19/04/2018 |
| 100.26_152 | LUTHREE - MELD_100.26 | 19/04/2018 |
| 100.26_153 | LUTHREE - MELD_100.26 | 19/04/2018 |



|            |                       |            |
|------------|-----------------------|------------|
| 100.26_154 | LUTHREE - MELD_100.26 | 19/04/2018 |
| 100.26_155 | LUTHREE - MELD_100.26 | 02/05/2018 |
| 100.26_156 | LUTHREE - MELD_100.26 | 02/05/2018 |
| 100.26_157 | LUTHREE - MELD_100.26 | 02/05/2018 |
| 100.26_158 | LUTHREE - MELD_100.26 | 02/05/2018 |
| 100.26_159 | LUTHREE - MELD_100.26 | 02/05/2018 |
| 100.26_160 | LUTHREE - MELD_100.26 | 11/05/2018 |
| 100.26_161 | LUTHREE - MELD_100.26 | 21/05/2018 |
| 100.26_163 | LUTHREE - MELD_100.26 | 21/05/2018 |
| 100.26_164 | LUTHREE - MELD_100.26 | 31/05/2018 |
| 100.26_165 | LUTHREE - MELD_100.26 | 08/06/2018 |
| 100.26_166 | LUTHREE - MELD_100.26 | 08/06/2018 |
| 100.26_167 | LUTHREE - MELD_100.26 | 08/06/2018 |
| 100.26_168 | LUTHREE - MELD_100.26 | 08/06/2018 |
| 100.26_169 | LUTHREE - MELD_100.26 | 08/06/2018 |
| 100.26_170 | LUTHREE - MELD_100.26 | 13/06/2018 |
| 100.26_171 | LUTHREE - MELD_100.26 | 13/06/2018 |
| 100.26_172 | LUTHREE - MELD_100.26 | 20/06/2018 |
| 100.26_173 | LUTHREE - MELD_100.26 | 22/06/2018 |
| 100.26_174 | LUTHREE - MELD_100.26 | 22/06/2018 |
| 100.26_175 | LUTHREE - MELD_100.26 | 22/06/2018 |
| 100.26_176 | LUTHREE - MELD_100.26 | 22/06/2018 |
| 100.26_177 | LUTHREE - MELD_100.26 | 10/07/2018 |
| 100.26_178 | LUTHREE - MELD_100.26 | 10/07/2018 |
| 100.26_179 | LUTHREE - MELD_100.26 | 10/07/2018 |
| 100.26_180 | LUTHREE - MELD_100.26 | 10/07/2018 |
| 100.26_181 | LUTHREE - MELD_100.26 | 16/07/2018 |
| 100.26_182 | LUTHREE - MELD_100.26 | 25/07/2018 |
| 100.26_183 | LUTHREE - MELD_100.26 | 25/07/2018 |
| 100.26_184 | LUTHREE - MELD_100.26 | 03/08/2018 |
| 100.26_185 | LUTHREE - MELD_100.26 | 03/08/2018 |
| 100.26_186 | LUTHREE - MELD_100.26 | 08/08/2018 |

|            |                       |            |
|------------|-----------------------|------------|
| 100.26_187 | LUTHREE - MELD_100.26 | 20/08/2018 |
| 100.26_188 | LUTHREE - MELD_100.26 | 13/09/2018 |
| 100.26_189 | LUTHREE - MELD_100.26 | 21/09/2018 |
| 100.26_190 | LUTHREE - MELD_100.26 | 28/09/2018 |
| 100.26_191 | LUTHREE - MELD_100.26 | 28/09/2018 |
| 100.26_192 | LUTHREE - MELD_100.26 | 28/09/2018 |
| 100.26_193 | LUTHREE - MELD_100.26 | 02/10/2018 |
| 100.26_194 | LUTHREE - MELD_100.26 | 05/10/2018 |
| 100.26_195 | LUTHREE - MELD_100.26 | 05/10/2018 |
| 100.26_196 | LUTHREE - MELD_100.26 | 05/10/2018 |
| 100.26_197 | LUTHREE - MELD_100.26 | 09/10/2018 |
| 100.26_198 | LUTHREE - MELD_100.26 | 09/10/2018 |
| 100.26_199 | LUTHREE - MELD_100.26 | 16/10/2018 |
| 100.26_200 | LUTHREE - MELD_100.26 | 16/10/2018 |
| 100.26_201 | LUTHREE - MELD_100.26 | 16/10/2018 |
| 100.26_202 | LUTHREE - MELD_100.26 | 16/10/2018 |
| 100.26_203 | LUTHREE - MELD_100.26 | 16/10/2018 |
| 100.26_204 | LUTHREE - MELD_100.26 | 16/10/2018 |
| 100.26_205 | LUTHREE - MELD_100.26 | 18/10/2018 |
| 100.26_206 | LUTHREE - MELD_100.26 | 25/10/2018 |
| 100.26_207 | LUTHREE - MELD_100.26 | 26/10/2018 |
| 100.26_208 | LUTHREE - MELD_100.26 | 26/10/2018 |
| 100.26_209 | LUTHREE - MELD_100.26 | 26/10/2018 |
| 100.26_210 | LUTHREE - MELD_100.26 | 13/11/2018 |
| 100.26_211 | LUTHREE - MELD_100.26 | 20/11/2018 |
| 100.26_212 | LUTHREE - MELD_100.26 | 26/11/2018 |
| 100.26_213 | LUTHREE - MELD_100.26 | 28/11/2018 |
| 100.26_214 | LUTHREE - MELD_100.26 | 29/11/2018 |
| 100.26_215 | LUTHREE - MELD_100.26 | 04/12/2018 |
| 100.26_216 | LUTHREE - MELD_100.26 | 05/12/2018 |
| 100.26_217 | LUTHREE - MELD_100.26 | 12/12/2018 |
| 100.26_218 | LUTHREE - MELD_100.26 | 12/12/2018 |

|            |                       |            |
|------------|-----------------------|------------|
| 100.26_219 | LUTHREE - MELD_100.26 | 12/12/2018 |
| 100.26_220 | LUTHREE - MELD_100.26 | 27/12/2018 |
| 100.26_221 | LUTHREE - MELD_100.26 | 27/12/2018 |
| 100.26_222 | LUTHREE - MELD_100.26 | 08/01/2019 |
| 100.26_223 | LUTHREE - MELD_100.26 | 08/01/2019 |
| 100.26_224 | LUTHREE - MELD_100.26 | 15/01/2019 |
| 100.26_225 | LUTHREE - MELD_100.26 | 15/01/2019 |
| 100.26_226 | LUTHREE - MELD_100.26 | 16/01/2019 |
| 100.26_227 | LUTHREE - MELD_100.26 | 22/01/2019 |
| 100.26_228 | LUTHREE - MELD_100.26 | 22/01/2019 |
| 100.26_229 | LUTHREE - MELD_100.26 | 22/01/2019 |
| 100.26_230 | LUTHREE - MELD_100.26 | 22/01/2019 |
| 100.26_231 | LUTHREE - MELD_100.26 | 25/01/2019 |
| 100.26_232 | LUTHREE - MELD_100.26 | 01/02/2019 |
| 100.26_233 | LUTHREE - MELD_100.26 | 01/02/2019 |
| 100.26_234 | LUTHREE - MELD_100.26 | 01/02/2019 |
| 100.26_235 | LUTHREE - MELD_100.26 | 01/02/2019 |
| 100.26_236 | LUTHREE - MELD_100.26 | 01/02/2019 |
| 100.26_237 | LUTHREE - MELD_100.26 | 07/02/2019 |
| 100.26_238 | LUTHREE - MELD_100.26 | 15/02/2019 |
| 100.26_239 | LUTHREE - MELD_100.26 | 15/02/2019 |
| 100.26_240 | LUTHREE - MELD_100.26 | 15/02/2019 |
| 100.26_241 | LUTHREE - MELD_100.26 | 15/02/2019 |
| 100.26_242 | LUTHREE - MELD_100.26 | 15/02/2019 |
| 100.26_243 | LUTHREE - MELD_100.26 | 22/02/2019 |
| 100.26_244 | LUTHREE - MELD_100.26 | 22/02/2019 |
| 100.26_245 | LUTHREE - MELD_100.26 | 25/02/2019 |
| 100.26_246 | LUTHREE - MELD_100.26 | 27/02/2019 |
| 100.26_247 | LUTHREE - MELD_100.26 | 27/02/2019 |
| 100.26_248 | LUTHREE - MELD_100.26 | 27/02/2019 |
| 100.26_249 | LUTHREE - MELD_100.26 | 28/02/2019 |
| 100.26_250 | LUTHREE - MELD_100.26 | 06/03/2019 |

|            |                       |            |
|------------|-----------------------|------------|
| 100.26_251 | LUTHREE - MELD_100.26 | 08/03/2019 |
| 100.26_252 | LUTHREE - MELD_100.26 | 08/03/2019 |
| 100.26_253 | LUTHREE - MELD_100.26 | 11/03/2019 |
| 100.26_254 | LUTHREE - MELD_100.26 | 11/03/2019 |
| 100.26_255 | LUTHREE - MELD_100.26 | 20/03/2019 |
| 100.26_256 | LUTHREE - MELD_100.26 | 29/03/2019 |
| 100.26_257 | LUTHREE - MELD_100.26 | 03/04/2019 |
| 100.26_258 | LUTHREE - MELD_100.26 | 04/04/2019 |
| 100.26_259 | LUTHREE - MELD_100.26 | 19/04/2019 |
| 100.26_260 | LUTHREE - MELD_100.26 | 23/04/2019 |
| 100.26_261 | LUTHREE - MELD_100.26 | 23/04/2019 |
| 100.26_262 | LUTHREE - MELD_100.26 | 29/04/2019 |
| 100.26_263 | LUTHREE - MELD_100.26 | 29/04/2019 |
| 100.26_264 | LUTHREE - MELD_100.26 | 03/05/2019 |
| 100.26_265 | LUTHREE - MELD_100.26 | 14/05/2019 |
| 100.26_266 | LUTHREE - MELD_100.26 | 16/05/2019 |
| 100.26_267 | LUTHREE - MELD_100.26 | 21/05/2019 |
| 100.26_268 | LUTHREE - MELD_100.26 | 21/05/2019 |
| 100.26_269 | LUTHREE - MELD_100.26 | 21/05/2019 |
| 100.26_270 | LUTHREE - MELD_100.26 | 21/05/2019 |
| 100.26_271 | LUTHREE - MELD_100.26 | 29/05/2019 |
| 100.26_272 | LUTHREE - MELD_100.26 | 29/05/2019 |
| 100.26_273 | LUTHREE - MELD_100.26 | 30/05/2019 |
| 100.26_274 | LUTHREE - MELD_100.26 | 31/05/2019 |
| 100.26_275 | LUTHREE - MELD_100.26 | 06/06/2019 |
| 100.26_276 | LUTHREE - MELD_100.26 | 14/06/2019 |
| 100.26_277 | LUTHREE - MELD_100.26 | 28/06/2019 |
| 100.26_278 | LUTHREE - MELD_100.26 | 03/07/2019 |
| 100.26_279 | LUTHREE - MELD_100.26 | 03/07/2019 |
| 100.26_280 | LUTHREE - MELD_100.26 | 10/07/2019 |
| 100.26_281 | LUTHREE - MELD_100.26 | 17/07/2019 |
| 100.26_282 | LUTHREE - MELD_100.26 | 21/08/2019 |

|            |                       |            |
|------------|-----------------------|------------|
| 100.26_283 | LUTHREE - MELD_100.26 | 21/08/2019 |
| 100.26_284 | LUTHREE - MELD_100.26 | 22/08/2019 |
| 100.26_285 | LUTHREE - MELD_100.26 | 28/08/2019 |
| 100.26_286 | LUTHREE - MELD_100.26 | 28/08/2019 |
| 100.26_287 | LUTHREE - MELD_100.26 | 29/08/2019 |
| 100.26_288 | LUTHREE - MELD_100.26 | 06/09/2019 |
| 100.26_289 | LUTHREE - MELD_100.26 | 09/09/2019 |
| 100.26_290 | LUTHREE - MELD_100.26 | 09/09/2019 |
| 100.26_291 | LUTHREE - MELD_100.26 | 13/09/2019 |
| 100.26_292 | LUTHREE - MELD_100.26 | 13/09/2019 |
| 100.26_293 | LUTHREE - MELD_100.26 | 13/09/2019 |
| 100.26_294 | LUTHREE - MELD_100.26 | 17/09/2019 |
| 100.26_295 | LUTHREE - MELD_100.26 | 17/09/2019 |
| 100.26_296 | LUTHREE - MELD_100.26 | 20/09/2019 |
| 100.26_297 | LUTHREE - MELD_100.26 | 24/09/2019 |
| 100.26_298 | LUTHREE - MELD_100.26 | 02/10/2019 |
| 100.26_299 | LUTHREE - MELD_100.26 | 15/10/2019 |
| 100.26_300 | LUTHREE - MELD_100.26 | 15/10/2019 |
| 100.26_301 | LUTHREE - MELD_100.26 | 15/10/2019 |
| 100.26_302 | LUTHREE - MELD_100.26 | 15/10/2019 |
| 100.26_303 | LUTHREE - MELD_100.26 | 18/10/2019 |
| 100.26_304 | LUTHREE - MELD_100.26 | 21/10/2019 |
| 100.26_305 | LUTHREE - MELD_100.26 | 21/10/2019 |
| 100.26_306 | LUTHREE - MELD_100.26 | 24/10/2019 |
| 100.26_307 | LUTHREE - MELD_100.26 | 29/10/2019 |
| 100.26_308 | LUTHREE - MELD_100.26 | 06/11/2019 |
| 100.26_309 | LUTHREE - MELD_100.26 | 07/11/2019 |
| 100.26_310 | LUTHREE - MELD_100.26 | 11/11/2019 |
| 100.26_311 | LUTHREE - MELD_100.26 | 14/11/2019 |
| 100.26_312 | LUTHREE - MELD_100.26 | 14/11/2019 |
| 100.26_313 | LUTHREE - MELD_100.26 | 21/11/2019 |
| 100.26_314 | LUTHREE - MELD_100.26 | 21/11/2019 |

|            |                       |            |
|------------|-----------------------|------------|
| 100.26_315 | LUTHREE - MELD_100.26 | 27/11/2019 |
| 100.26_316 | LUTHREE - MELD_100.26 | 27/11/2019 |
| 100.26_317 | LUTHREE - MELD_100.26 | 28/11/2019 |
| 100.26_318 | LUTHREE - MELD_100.26 | 05/12/2019 |
| 100.26_319 | LUTHREE - MELD_100.26 | 05/12/2019 |
| 100.26_320 | LUTHREE - MELD_100.26 | 05/12/2019 |
| 100.26_321 | LUTHREE - MELD_100.26 | 12/12/2019 |
| 100.26_322 | LUTHREE - MELD_100.26 | 12/12/2019 |
| 100.26_323 | LUTHREE - MELD_100.26 | 13/12/2019 |
| 100.26_324 | LUTHREE - MELD_100.26 | 15/01/2020 |
| 100.26_325 | LUTHREE - MELD_100.26 | 22/01/2020 |
| 100.26_326 | LUTHREE - MELD_100.26 | 22/01/2020 |
| 100.26_327 | LUTHREE - MELD_100.26 | 24/01/2020 |
| 100.26_328 | LUTHREE - MELD_100.26 | 29/01/2020 |
| 100.26_329 | LUTHREE - MELD_100.26 | 30/01/2020 |
| 100.26_330 | LUTHREE - MELD_100.26 | 30/01/2020 |
| 100.26_331 | LUTHREE - MELD_100.26 | 06/02/2020 |
| 100.26_332 | LUTHREE - MELD_100.26 | 06/02/2020 |
| 100.26_333 | LUTHREE - MELD_100.26 | 06/02/2020 |
| 100.26_334 | LUTHREE - MELD_100.26 | 06/02/2020 |
| 100.26_335 | LUTHREE - MELD_100.26 | 17/02/2020 |
| 100.26_336 | LUTHREE - MELD_100.26 | 19/02/2020 |
| 100.26_337 | LUTHREE - MELD_100.26 | 20/02/2020 |
| 100.26_338 | LUTHREE - MELD_100.26 | 20/02/2020 |
| 100.26_339 | LUTHREE - MELD_100.26 | 21/02/2020 |
| 100.26_340 | LUTHREE - MELD_100.26 | 21/02/2020 |
| 100.26_341 | LUTHREE - MELD_100.26 | 26/02/2020 |
| 100.26_342 | LUTHREE - MELD_100.26 | 04/03/2020 |
| 100.26_343 | LUTHREE - MELD_100.26 | 04/03/2020 |
| 100.26_344 | LUTHREE - MELD_100.26 | 04/03/2020 |
| 100.26_345 | LUTHREE - MELD_100.26 | 06/03/2020 |
| 100.26_346 | LUTHREE - MELD_100.26 | 09/03/2020 |

|            |                       |            |
|------------|-----------------------|------------|
| 100.26_347 | LUTHREE - MELD_100.26 | 11/03/2020 |
| 100.26_348 | LUTHREE - MELD_100.26 | 11/03/2020 |
| 100.26_349 | LUTHREE - MELD_100.26 | 11/03/2020 |
| 100.26_350 | LUTHREE - MELD_100.26 | 11/03/2020 |
| 100.26_351 | LUTHREE - MELD_100.26 | 25/03/2020 |
| 100.26_352 | LUTHREE - MELD_100.26 | 25/03/2020 |
| 100.26_353 | LUTHREE - MELD_100.26 | 01/04/2020 |
| 100.26_354 | LUTHREE - MELD_100.26 | 08/04/2020 |
| 100.26_355 | LUTHREE - MELD_100.26 | 15/04/2020 |
| 100.26_356 | LUTHREE - MELD_100.26 | 15/04/2020 |
| 100.26_357 | LUTHREE - MELD_100.26 | 22/04/2020 |
| 100.26_358 | LUTHREE - MELD_100.26 | 29/04/2020 |
| 100.26_359 | LUTHREE - MELD_100.26 | 30/04/2020 |
| 100.26_360 | LUTHREE - MELD_100.26 | 06/05/2020 |
| 100.26_361 | LUTHREE - MELD_100.26 | 20/05/2020 |
| 100.26_362 | LUTHREE - MELD_100.26 | 25/05/2020 |
| 100.26_363 | LUTHREE - MELD_100.26 | 27/05/2020 |
| 100.26_364 | LUTHREE - MELD_100.26 | 29/05/2020 |
| 100.26_365 | LUTHREE - MELD_100.26 | 29/05/2020 |
| 100.26_366 | LUTHREE - MELD_100.26 | 03/06/2020 |
| 100.26_367 | LUTHREE - MELD_100.26 | 04/06/2020 |
| 100.26_368 | LUTHREE - MELD_100.26 | 04/06/2020 |
| 100.26_369 | LUTHREE - MELD_100.26 | 12/06/2020 |
| 100.26_370 | LUTHREE - MELD_100.26 | 18/06/2020 |
| 100.26_371 | LUTHREE - MELD_100.26 | 18/06/2020 |

Total patients enrolled at 11/03/2020: 345

Total patients enrolled 11/03/2019-30/06/2019: 25

Total patients enrolled 11/03/2020-30/06/2020: 25

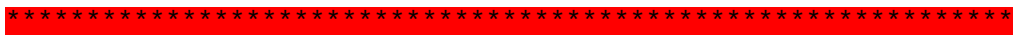

Study Name: IRST100.39 MESOVAX

Protocol ID: MESOVAX

Date: 2020-Oct-02

Subjects: 3

Study Event Definitions 1

Study Event Definition 2 Eligibility E2

CRF27 ELIGIBILITY CONFIRMATION [MESOVAX] - MESOVAX 0.1 C27

| Study Subject ID | Protocol ID           | ELGeDATEENROLL_E2_C27 |
|------------------|-----------------------|-----------------------|
| 100.39_002       | MESOVAX - MELD_100.39 | 19/12/2019            |
| 100.39_004       | MESOVAX - MELD_100.39 | 12/12/2019            |
| 100.39_005       | MESOVAX - MELD_100.39 | 26/03/2020            |

Total patients enrolled at 11/03/2020: 3

Total patients enrolled 11/03/2019-30/06/2019: 0

Total patients enrolled 11/03/2020-30/06/2020: 1

\*\*\*\*\*

Study Name: IRST100.42 RAC-AD

Protocol ID: RAC-AD

Date: 2020-Oct-02

Subjects: 0

Study Event Definitions 0

Study Subject ID Protocol ID

Total patients enrolled at 11/03/2020: 0

Total patients enrolled 11/03/2019-30/06/2019: 0

Total patients enrolled 11/03/2020-30/06/2020: 0

\*\*\*\*\*

Study Name: IRST153.04 COREVAX-1

Protocol ID: COREVAX-1

Date: 2020-Oct-02

Subjects: 0



Study Event Definitions 0

| Study Subject ID | Protocol ID             | RGSpPATIENTINF5_E1_C2 |
|------------------|-------------------------|-----------------------|
| 153.04_001       | COREVAX-1 - MELD_153.04 | 02/12/2016            |
| 153.04_002       | COREVAX-1 - MELD_153.04 | 07/04/2017            |
| 153.04_003       | COREVAX-1 - MELD_153.04 | 30/05/2017            |
| 153.04_004       | COREVAX-1 - MELD_153.04 | 19/06/2017            |
| 153.04_005       | COREVAX-1 - MELD_153.04 | 03/07/2017            |
| 153.04_006       | COREVAX-1 - MELD_153.04 | 16/11/2017            |
| 153.04_007       | COREVAX-1 - MELD_153.04 | 20/02/2018            |
| 153.04_008       | COREVAX-1 - MELD_153.04 | 08/05/2018            |
| 153.04_009       | COREVAX-1 - MELD_153.04 | 01/04/2019            |
| 153.04_010       | COREVAX-1 - MELD_153.04 | 07/01/2020            |
| 153.04_011       | COREVAX-1 - MELD_153.04 | 09/03/2020            |

Total patients enrolled at 11/03/2020: 11

Total patients enrolled 11/03/2019-30/06/2019: 1

Total patients enrolled 11/03/2020-30/06/2020: 0

\*\*\*\*\*

Study Name: IRST163.01 MESORT

Protocol ID: MESORT

Date: 2020-Oct-04

Subjects: 22

Study Event

Definitions 1

Study Event

Definition 2 REGISTRATION CONFIRMATION E2

REGISTRATION CONFIRMATION

CRF13 [MESORT] - MESORT 0.1 C13

Study Subject ID Protocol ID

|            |                      |            |
|------------|----------------------|------------|
| 163.01_002 | MESORT - MELD_163.01 | 30/08/2017 |
| 163.01_001 | MESORT - MELD_163.01 | 05/09/2017 |
| 163.01_003 | MESORT - MELD_163.01 | 08/09/2017 |
| 163.01_004 | MESORT - MELD_163.01 | 08/09/2017 |
| 163.01_005 | MESORT - MELD_163.01 | 09/10/2017 |
| 163.01_006 | MESORT - MELD_163.01 | 20/10/2017 |
| 163.01_007 | MESORT - MELD_163.01 | 13/11/2017 |
| 163.01_008 | MESORT - MELD_163.01 | 05/12/2017 |
| 163.01_009 | MESORT - MELD_163.01 | 23/01/2018 |
| 163.01_010 | MESORT - MELD_163.01 | 02/02/2018 |
| 163.01_011 | MESORT - MELD_163.01 | 17/04/2018 |
| 163.01_012 | MESORT - MELD_163.01 | 20/06/2018 |
| 163.01_013 | MESORT - MELD_163.01 | 30/07/2018 |
| 163.01_014 | MESORT - MELD_163.01 | 21/09/2018 |
| 163.01_016 | MESORT - MELD_163.01 | 09/10/2018 |
| 163.01_017 | MESORT - MELD_163.01 | 17/10/2018 |
| 163.01_018 | MESORT - MELD_163.01 | 08/01/2019 |
| 163.01_019 | MESORT - MELD_163.01 | 13/02/2019 |
| 163.01_020 | MESORT - MELD_163.01 | 27/02/2019 |
| 163.01_021 | MESORT - MELD_163.01 | 12/06/2019 |
| 163.01_022 | MESORT - MELD_163.01 | 19/06/2019 |
| 163.01_023 | MESORT - MELD_163.01 | 20/05/2020 |

Total patients enrolled at 11/03/2020: 21

Total patients enrolled 11/03/2019-30/06/2019: 2

Total patients enrolled 11/03/2020-30/06/2020: 1

\*\*\*\*\*

Study Name: IRST172.02 ABSIDE

Protocol ID: ABSIDE

Date: 2020-Oct-04

Subjects: 26

Study Event

Definitions 1

Study Event

Definition 1 Randomization

CRF1 RANDOMIZATION - ABSIDE 1.0

| Study Subject ID | Protocol ID |                      |
|------------------|-------------|----------------------|
|                  | ABSIDE -    | RANDpABSIDE006_E1_C1 |
| 172.02_001       | MELD_172.02 | 08/10/2013           |
|                  | ABSIDE -    |                      |
| 172.02_002       | MELD_172.02 | 21/10/2013           |
|                  | ABSIDE -    |                      |
| 172.02_003       | MELD_172.02 | 19/02/2014           |
|                  | ABSIDE -    |                      |
| 172.02_004       | MELD_172.02 | 17/03/2014           |
|                  | ABSIDE -    |                      |
| 172.02_010       | MELD_172.02 | 29/04/2014           |
|                  | ABSIDE -    |                      |
| 172.02_005       | MELD_172.02 | 05/05/2014           |
|                  | ABSIDE -    |                      |
| 172.02_007       | MELD_172.02 | 18/12/2014           |
|                  | ABSIDE -    |                      |
| 172.02_011       | MELD_172.02 | 11/06/2015           |
|                  | ABSIDE -    |                      |
| 172.02_012       | MELD_172.02 | 27/01/2016           |
|                  | ABSIDE -    |                      |
| 172.02_013       | MELD_172.02 | 23/02/2016           |
|                  | ABSIDE -    |                      |
| 172.02_014       | MELD_172.02 | 29/04/2016           |
| 172.02_015       | ABSIDE -    | 05/05/2016           |

|            |             |            |
|------------|-------------|------------|
|            | MELD_172.02 |            |
|            | ABSIDE -    |            |
| 172.02_017 | MELD_172.02 | 13/10/2016 |
|            | ABSIDE -    |            |
| 172.02_018 | MELD_172.02 | 18/10/2016 |
|            | ABSIDE -    |            |
| 172.02_019 | MELD_172.02 | 24/10/2016 |
|            | ABSIDE -    |            |
| 172.02_020 | MELD_172.02 | 21/12/2016 |
|            | ABSIDE -    |            |
| 172.02_021 | MELD_172.02 | 18/01/2017 |
|            | ABSIDE -    |            |
| 172.02_022 | MELD_172.02 | 21/03/2017 |
|            | ABSIDE -    |            |
| 172.02_023 | MELD_172.02 | 04/12/2017 |
|            | ABSIDE -    |            |
| 172.02_024 | MELD_172.02 | 28/12/2017 |
|            | ABSIDE -    |            |
| 172.02_026 | MELD_172.02 | 09/04/2018 |
|            | ABSIDE -    |            |
| 172.02_027 | MELD_172.02 | 23/04/2019 |
|            | ABSIDE -    |            |
| 172.02_028 | MELD_172.02 | 26/04/2019 |
|            | ABSIDE -    |            |
| 172.02_029 | MELD_172.02 | 17/01/2020 |
|            | ABSIDE -    |            |
| 172.02_030 | MELD_172.02 | 15/06/2020 |
|            | ABSIDE -    |            |
| 172.02_031 | MELD_172.02 | 16/06/2020 |

Total patients enrolled at 11/03/2020: 24

Total patients enrolled 11/03/2019-30/06/2019: 2

Total patients enrolled 11/03/2020-30/06/2020: 2

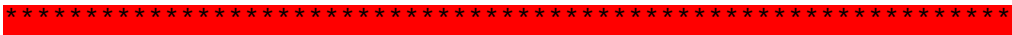

Study Name: **IRST172.03 IL2HD**

Protocol ID: IL2HD

Date: 2020-Oct-05

Subjects: 28

| Center        | ID Center | ID patient | Registration Date |
|---------------|-----------|------------|-------------------|
| IRST<br>IRCCS | 1         | 1          | 09-lug-12         |
| IRST<br>IRCCS | 1         | 2          | 03-ott-12         |
| IRST<br>IRCCS | 1         | 3          | 18-ott-12         |
| IRST<br>IRCCS | 1         | 4          | 10-dic-12         |
| IRST<br>IRCCS | 1         | 5          | 12-feb-13         |
| IRST<br>IRCCS | 1         | 6          | 10-apr-13         |
| IRST<br>IRCCS | 1         | 7          | 27-nov-13         |
| IRST<br>IRCCS | 1         | 8          | 06-mar-14         |
| IRST<br>IRCCS | 1         | 9          | 06-giu-14         |
| IRST<br>IRCCS | 1         | 10         | 01-set-14         |
| IRST<br>IRCCS | 1         | 11         | 03-mar-15         |

|               |   |    |           |
|---------------|---|----|-----------|
| IRST<br>IRCCS | 1 | 12 | 07-apr-15 |
| IRST<br>IRCCS | 1 | 13 | 12-mag-15 |
| IRST<br>IRCCS | 1 | 14 | 19-giu-15 |
| IRST<br>IRCCS | 1 | 15 | 04-ago-15 |
| IRST<br>IRCCS | 1 | 16 | 11-ago-15 |
| IRST<br>IRCCS | 1 | 17 | 04-dic-15 |
| IRST<br>IRCCS | 1 | 18 | 12-feb-16 |
| IRST<br>IRCCS | 1 | 19 | 09-mag-16 |
| IRST<br>IRCCS | 1 | 20 | 20-set-16 |
| IRST<br>IRCCS | 1 | 21 | 11-apr-17 |
| IRST<br>IRCCS | 1 | 22 | 01-ago-17 |
| IRST<br>IRCCS | 1 | 23 | 10-ago-18 |
| IRST<br>IRCCS | 1 | 24 | 06-mag-19 |
| IRST<br>IRCCS | 1 | 25 | 13-mag-19 |
| IRST<br>IRCCS | 1 | 26 | 23-set-19 |

|               |   |    |           |
|---------------|---|----|-----------|
| IRST<br>IRCCS | 1 | 27 | 18-mag-20 |
| IRST<br>IRCCS | 1 | 28 | 11-giu-20 |

Total patients enrolled at 11/03/2020: 26

Total patients enrolled 11/03/2019-30/06/2019: 2

Total patients enrolled 11/03/2020-30/06/2020: 2

\*\*\*\*\*

Study Name: IRST172.04 ACDC  
Protocol ID: ACDC adjuvant trial  
Date: 2020-Oct-05  
Subjects: 18  
Study Event  
Definitions 1  
Study Event  
Definition 1 Randomization  
RANDOMIZATION [ACDC] - ACDC  
CRF1 1.0

| Study Subject ID | Protocol ID           | RNDpDATERANDOMIZATION_E1_C1 |
|------------------|-----------------------|-----------------------------|
|                  | ACDC adjuvant trial - |                             |
| 172.04_001       | MELD_172.04           | 17/09/2015                  |
|                  | ACDC adjuvant trial - |                             |
| 172.04_002       | MELD_172.04           | 29/01/2016                  |
|                  | ACDC adjuvant trial - |                             |
| 172.04_003       | MELD_172.04           | 08/04/2016                  |
|                  | ACDC adjuvant trial - |                             |
| 172.04_004       | MELD_172.04           | 22/04/2016                  |
|                  | ACDC adjuvant trial - |                             |
| 172.04_005       | MELD_172.04           | 15/07/2016                  |

|            |                       |            |
|------------|-----------------------|------------|
|            | MELD_172.04           |            |
|            | ACDC adjuvant trial - |            |
| 172.04_006 | MELD_172.04           | 27/10/2016 |
|            | ACDC adjuvant trial - |            |
| 172.04_007 | MELD_172.04           | 13/01/2017 |
|            | ACDC adjuvant trial - |            |
| 172.04_008 | MELD_172.04           | 13/04/2017 |
|            | ACDC adjuvant trial - |            |
| 172.04_009 | MELD_172.04           | 16/08/2017 |
|            | ACDC adjuvant trial - |            |
| 172.04_010 | MELD_172.04           | 15/09/2017 |
|            | ACDC adjuvant trial - |            |
| 172.04_011 | MELD_172.04           | 27/09/2017 |
|            | ACDC adjuvant trial - |            |
| 172.04_012 | MELD_172.04           | 20/12/2017 |
|            | ACDC adjuvant trial - |            |
| 172.04_013 | MELD_172.04           | 14/02/2018 |
|            | ACDC adjuvant trial - |            |
| 172.04_014 | MELD_172.04           | 20/03/2018 |
|            | ACDC adjuvant trial - |            |
| 172.04_015 | MELD_172.04           | 21/03/2018 |
|            | ACDC adjuvant trial - |            |
| 172.04_016 | MELD_172.04           | 08/06/2018 |
|            | ACDC adjuvant trial - |            |
| 172.04_017 | MELD_172.04           | 14/06/2018 |
|            | ACDC adjuvant trial - |            |
| 172.04_018 | MELD_172.04           | 27/11/2018 |

Total patients enrolled at 11/03/2020: 18

Total patients enrolled 11/03/2019-30/06/2019: 0

Total patients enrolled 11/03/2020-30/06/2020: 0

\*\*\*\*\*



Study Name: IRST174.09 met-HEReMYTA

Protocol ID: met-HEReMYTA

Date: 2020-Oct-05

Subjects: 49

Study Event

Definitions 1

Study Event

Definition 1 Registration E1

REGISTRATION [met-HEReMYTA] - 1.0 met-

CRF1 HEReMYTA C1

Study Subject ID Protocol ID RGSpmTHEReMYTA009\_E1\_C1

174.09\_001 met-HEReMYTA - IRST\_174.09 17/12/2014

174.09\_002 met-HEReMYTA - IRST\_174.09 13/02/2015

174.09\_003 met-HEReMYTA - RIMI\_174.09 02/04/2015

174.09\_004 met-HEReMYTA - IRST\_174.09 01/09/2015

174.09\_005 met-HEReMYTA - IRST\_174.09 24/09/2015

174.09\_006 met-HEReMYTA - IRST\_174.09 09/10/2015

174.09\_007 met-HEReMYTA - IRST\_174.09 09/11/2015

174.09\_008 met-HEReMYTA - MODE\_174.09 30/11/2015

174.09\_009 met-HEReMYTA - IRST\_174.09 03/12/2015

174.09\_010 met-HEReMYTA - IRST\_174.09 04/01/2016

174.09\_011 met-HEReMYTA - IRST\_174.09 04/02/2016

174.09\_012 met-HEReMYTA - IRST\_174.09 11/02/2016

174.09\_013 met-HEReMYTA - MODE\_174.09 19/02/2016

174.09\_014 met-HEReMYTA - IRST\_174.09 03/03/2016

174.09\_016 met-HEReMYTA - IRST\_174.09 07/03/2016

174.09\_015 met-HEReMYTA - IRST\_174.09 07/03/2016

174.09\_017 met-HEReMYTA - IRST\_174.09 09/03/2016

174.09\_018 met-HEReMYTA - MODE\_174.09 08/04/2016

174.09\_019 met-HEReMYTA - MODE\_174.09 22/04/2016

174.09\_020 met-HEReMYTA - MODE\_174.09 25/05/2016

|            |                            |            |
|------------|----------------------------|------------|
| 174.09_021 | met-HEReMYTA - MODE_174.09 | 03/06/2016 |
| 174.09_022 | met-HEReMYTA - IRST_174.09 | 10/06/2016 |
| 174.09_023 | met-HEReMYTA - IRST_174.09 | 01/08/2016 |
| 174.09_024 | met-HEReMYTA - RIMI_174.09 | 15/12/2016 |
| 174.09_025 | met-HEReMYTA - RIMI_174.09 | 10/02/2017 |
| 174.09_026 | met-HEReMYTA - MODE_174.09 | 27/04/2017 |
| 174.09_027 | met-HEReMYTA - RIMI_174.09 | 12/05/2017 |
| 174.09_028 | met-HEReMYTA - IRST_174.09 | 25/05/2017 |
| 174.09_029 | met-HEReMYTA - MODE_174.09 | 29/05/2017 |
| 174.09_030 | met-HEReMYTA - IRST_174.09 | 04/07/2017 |
| 174.09_031 | met-HEReMYTA - IRST_174.09 | 31/08/2017 |
| 174.09_032 | met-HEReMYTA - IRST_174.09 | 05/09/2017 |
| 174.09_033 | met-HEReMYTA - RIMI_174.09 | 11/09/2017 |
| 174.09_034 | met-HEReMYTA - IMOL_174.09 | 05/10/2017 |
| 174.09_035 | met-HEReMYTA - RIMI_174.09 | 06/10/2017 |
| 174.09_036 | met-HEReMYTA - IRST_174.09 | 11/10/2017 |
| 174.09_037 | met-HEReMYTA - MODE_174.09 | 08/11/2017 |
| 174.09_038 | met-HEReMYTA - IMOL_174.09 | 17/11/2017 |
| 174.09_039 | met-HEReMYTA - IRST_174.09 | 07/02/2018 |
| 174.09_040 | met-HEReMYTA - IRST_174.09 | 28/02/2018 |
| 174.09_041 | met-HEReMYTA - IMOL_174.09 | 22/03/2018 |
| 174.09_042 | met-HEReMYTA - RIMI_174.09 | 04/04/2018 |
| 174.09_043 | met-HEReMYTA - RIMI_174.09 | 17/04/2018 |
| 174.09_044 | met-HEReMYTA - IRST_174.09 | 20/04/2018 |
| 174.09_045 | met-HEReMYTA - IRST_174.09 | 24/04/2018 |
| 174.09_046 | met-HEReMYTA - IMOL_174.09 | 30/04/2018 |
| 174.09_047 | met-HEReMYTA - PIAC_174.09 | 14/05/2018 |
| 174.09_048 | met-HEReMYTA - MODE_174.09 | 22/05/2018 |
| 174.09_049 | met-HEReMYTA - IMOL_174.09 | 23/05/2018 |

Total patients enrolled at 11/03/2020: 49

Total patients enrolled 11/03/2019-30/06/2019: 0

Total patients enrolled 11/03/2020-30/06/2020: 0

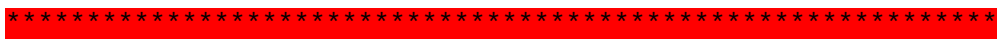

Study Name: **IRST174.19 KENDO**  
Protocol ID: CHENDO  
Date: 2020-Oct-05  
Subjects: 41  
Study Event  
Definitions 1

Study Event  
Definition 2 Randomization E2  
RANDOMIZATION [CHENDO] - CHENDO  
CRF20 2.0 C20  
RANDOMIZATION [CHENDO] - CHENDO  
CRF21 1.0 C21

| Study Subject ID | Protocol ID            | RNDrRANDOMIZATIONDATE_E2_C20 |
|------------------|------------------------|------------------------------|
| 174.19_001       | CHENDO - MELD_174.19   | 07/08/2017                   |
| 174.19_002       | CHENDO - RAFALU_174.19 | 04/09/2017                   |
| 174.19_003       | CHENDO - CARP_174.19   | 04/10/2017                   |
| 174.19_004       | CHENDO - MELD_174.19   | 17/10/2017                   |
| 174.19_005       | CHENDO - MELD_174.19   | 28/12/2017                   |
| 174.19_006       | CHENDO - MELD_174.19   | 08/01/2018                   |
| 174.19_007       | CHENDO - MELD_174.19   | 11/01/2018                   |
| 174.19_008       | CHENDO - RAFALU_174.19 | 24/01/2018                   |
| 174.19_009       | CHENDO - MELD_174.19   | 06/02/2018                   |
| 174.19_010       | CHENDO - MELD_174.19   | 19/02/2018                   |
| 174.19_011       | CHENDO - RAFALU_174.19 | 28/02/2018                   |
| 174.19_012       | CHENDO - CARP_174.19   | 07/03/2018                   |
| 174.19_013       | CHENDO - MELD_174.19   | 20/04/2018                   |
| 174.19_014       | CHENDO - RAFALU_174.19 | 14/05/2018                   |

|            |                      |            |
|------------|----------------------|------------|
| 174.19_015 | CHENDO - MELD_174.19 | 24/05/2018 |
| 174.19_016 | CHENDO - MELD_174.19 | 14/06/2018 |
| 174.19_018 | CHENDO - PIAC_174.19 | 19/02/2019 |
| 174.19_019 | CHENDO - PIAC_174.19 | 21/02/2019 |
| 174.19_020 | CHENDO - MELD_174.19 | 21/03/2019 |
| 174.19_021 | CHENDO - CREM_174.19 | 02/05/2019 |
| 174.19_022 | CHENDO - MELD_174.19 | 28/05/2019 |
| 174.19_023 | CHENDO - MELD_174.19 | 19/06/2019 |
| 174.19_024 | CHENDO - MELD_174.19 | 08/07/2019 |
| 174.19_025 | CHENDO - LEGN_174.19 | 11/07/2019 |
| 174.19_027 | CHENDO - MELD_174.19 | 09/09/2019 |
| 174.19_028 | CHENDO - MELD_174.19 | 06/11/2019 |
| 174.19_029 | CHENDO - MELD_174.19 | 27/01/2020 |
| 174.19_030 | CHENDO - CARP_174.19 | 10/02/2020 |
| 174.19_031 | CHENDO - CARP_174.19 | 12/02/2020 |
| 174.19_033 | CHENDO - RIMI_174.19 | 21/02/2020 |
| 174.19_032 | CHENDO - MELD_174.19 | 24/02/2020 |
| 174.19_034 | CHENDO - MELD_174.19 | 05/03/2020 |
| 174.19_035 | CHENDO - MELD_174.19 | 23/03/2020 |
| 174.19_036 | CHENDO - CARP_174.19 | 31/03/2020 |
| 174.19_037 | CHENDO - CARP_174.19 | 03/04/2020 |
| 174.19_038 | CHENDO - MELD_174.19 | 05/05/2020 |
| 174.19_039 | CHENDO - FERR_174.19 | 06/05/2020 |
| 174.19_040 | CHENDO - MELD_174.19 | 08/05/2020 |
| 174.19_041 | CHENDO - MELD_174.19 | 08/05/2020 |
| 174.19_043 | CHENDO - MELD_174.19 | 01/06/2020 |
| 174.19_042 | CHENDO - MELD_174.19 | 04/06/2020 |

Total patients enrolled at 11/03/2020: 32

Total patients enrolled 11/03/2019-30/06/2019: 4

Total patients enrolled 11/03/2020-30/06/2020: 9

\*\*\*\*\*

Study Name: **IRST 185.03 LUPSMA**

Protocol ID: LUPSMA

Date: 2020-Oct-05

Subjects: 68

Study Event

Definitions 1

Study Event

Definition 2 Registration confirmation E2

REGISTRATION CONFIRMATION [LUPSMA] -

CRF6 LUPSMA 0.1 C6

RGCellELIGIBILITY006\_E2\_C

| Study Subject ID | Protocol ID          | 6          |
|------------------|----------------------|------------|
| 185.03_009       | LUPSMA - MELD_185.03 | 22/06/2017 |
| 185.03_010       | LUPSMA - MELD_185.03 | 22/06/2017 |
| 185.03_011       | LUPSMA - MELD_185.03 | 22/06/2017 |
| 185.03_013       | LUPSMA - MELD_185.03 | 24/08/2017 |
| 185.03_012       | LUPSMA - MELD_185.03 | 12/09/2017 |
| 185.03_014       | LUPSMA - MELD_185.03 | 12/09/2017 |
| 185.03_015       | LUPSMA - MELD_185.03 | 16/10/2017 |
| 185.03_016       | LUPSMA - MELD_185.03 | 23/10/2017 |
| 185.03_017       | LUPSMA - MELD_185.03 | 23/10/2017 |
| 185.03_018       | LUPSMA - MELD_185.03 | 23/10/2017 |
| 185.03_019       | LUPSMA - MELD_185.03 | 03/11/2017 |
| 185.03_020       | LUPSMA - MELD_185.03 | 03/11/2017 |
| 185.03_021       | LUPSMA - MELD_185.03 | 08/11/2017 |
| 185.03_022       | LUPSMA - MELD_185.03 | 09/11/2017 |
| 185.03_023       | LUPSMA - MELD_185.03 | 20/11/2017 |
| 185.03_024       | LUPSMA - MELD_185.03 | 13/12/2017 |
| 185.03_025       | LUPSMA - MELD_185.03 | 17/01/2018 |

|            |                      |            |
|------------|----------------------|------------|
| 185.03_026 | LUPSMA - MELD_185.03 | 23/02/2018 |
| 185.03_027 | LUPSMA - MELD_185.03 | 19/03/2018 |
| 185.03_028 | LUPSMA - MELD_185.03 | 28/03/2018 |
| 185.03_029 | LUPSMA - MELD_185.03 | 28/03/2018 |
| 185.03_030 | LUPSMA - MELD_185.03 | 04/04/2018 |
| 185.03_031 | LUPSMA - MELD_185.03 | 04/04/2018 |
| 185.03_032 | LUPSMA - MELD_185.03 | 11/05/2018 |
| 185.03_033 | LUPSMA - MELD_185.03 | 21/05/2018 |
| 185.03_001 | LUPSMA - MELD_185.03 | 05/06/2018 |
| 185.03_002 | LUPSMA - MELD_185.03 | 05/06/2018 |
| 185.03_003 | LUPSMA - MELD_185.03 | 05/06/2018 |
| 185.03_004 | LUPSMA - MELD_185.03 | 05/06/2018 |
| 185.03_005 | LUPSMA - MELD_185.03 | 05/06/2018 |
| 185.03_006 | LUPSMA - MELD_185.03 | 05/06/2018 |
| 185.03_007 | LUPSMA - MELD_185.03 | 05/06/2018 |
| 185.03_008 | LUPSMA - MELD_185.03 | 05/06/2018 |
| 185.03_034 | LUPSMA - MELD_185.03 | 29/06/2018 |
| 185.03_035 | LUPSMA - MELD_185.03 | 03/07/2018 |
| 185.03_037 | LUPSMA - MELD_185.03 | 06/08/2018 |
| 185.03_036 | LUPSMA - MELD_185.03 | 27/08/2018 |
| 185.03_038 | LUPSMA - MELD_185.03 | 05/09/2018 |
| 185.03_039 | LUPSMA - MELD_185.03 | 25/10/2018 |
| 185.03_040 | LUPSMA - MELD_185.03 | 22/11/2018 |
| 185.03_042 | LUPSMA - MELD_185.03 | 22/11/2018 |
| 185.03_041 | LUPSMA - MELD_185.03 | 26/11/2018 |
| 185.03_043 | LUPSMA - MELD_185.03 | 27/11/2018 |
| 185.03_044 | LUPSMA - MELD_185.03 | 11/02/2019 |
| 185.03_046 | LUPSMA - MELD_185.03 | 20/03/2019 |
| 185.03_047 | LUPSMA - MELD_185.03 | 29/03/2019 |
| 185.03_048 | LUPSMA - MELD_185.03 | 03/04/2019 |
| 185.03_049 | LUPSMA - MELD_185.03 | 10/05/2019 |
| 185.03_050 | LUPSMA - MELD_185.03 | 21/05/2019 |

|            |                      |            |
|------------|----------------------|------------|
| 185.03_051 | LUPSMA - MELD_185.03 | 22/05/2019 |
| 185.03_052 | LUPSMA - MELD_185.03 | 02/07/2019 |
| 185.03_053 | LUPSMA - MELD_185.03 | 03/07/2019 |
| 185.03_054 | LUPSMA - MELD_185.03 | 24/07/2019 |
| 185.03_055 | LUPSMA - MELD_185.03 | 09/08/2019 |
| 185.03_056 | LUPSMA - MELD_185.03 | 23/08/2019 |
| 185.03_057 | LUPSMA - MELD_185.03 | 27/08/2019 |
| 185.03_058 | LUPSMA - MELD_185.03 | 08/10/2019 |
| 185.03_059 | LUPSMA - MELD_185.03 | 04/11/2019 |
| 185.03_061 | LUPSMA - MELD_185.03 | 11/12/2019 |
| 185.03_062 | LUPSMA - MELD_185.03 | 17/01/2020 |
| 185.03_063 | LUPSMA - MELD_185.03 | 06/03/2020 |
| 185.03_064 | LUPSMA - MELD_185.03 | 06/03/2020 |
| 185.03_065 | LUPSMA - MELD_185.03 | 16/03/2020 |
| 185.03_066 | LUPSMA - MELD_185.03 | 25/03/2020 |
| 185.03_067 | LUPSMA - MELD_185.03 | 21/04/2020 |
| 185.03_068 | LUPSMA - MELD_185.03 | 19/05/2020 |
| 185.03_069 | LUPSMA - MELD_185.03 | 05/06/2020 |
| 185.03_070 | LUPSMA - MELD_185.03 | 23/06/2020 |

Total patients enrolled at 11/03/2020: 62

Total patients enrolled 11/03/2019-30/06/2019: 6

Total patients enrolled 11/03/2020-30/06/2020: 6

\*\*\*\*\*

Study Name: IRST185.04 RAPSON

Protocol ID: RAPSON

Date: 2020-Oct-02

Subjects: 5

Study Event Definitions 1

Study Event Definition 2 Randomization E2

CRF24 RANDOMIZATION [RAPSON] - RAPSON 1.0 C24

| Study Subject ID | Protocol ID          | RNDrRANDOMIZATIONDATE_E2_C24 |
|------------------|----------------------|------------------------------|
| 185.04_001       | RAPSON - MELD_185.04 | 01/09/2017                   |
| 185.04_002       | RAPSON - BOLZ_185.04 | 17/11/2017                   |
| 185.04_004       | RAPSON - MELD_185.04 | 03/04/2018                   |
| 185.04_005       | RAPSON - MELD_185.04 | 03/04/2018                   |
| 185.04_006       | RAPSON - NEGR_185.04 | 08/05/2018                   |
| 185.04_007       | RAPSON - MELD_185.04 | 29/05/2018                   |
| 185.04_008       | RAPSON - PISA_185.04 | 20/06/2018                   |
| 185.04_009       | RAPSON - PARM_185.04 | 05/07/2018                   |
| 185.04_011       | RAPSON - MELD_185.04 | 26/02/2020                   |
| 185.04_012       | RAPSON - MELD_185.04 | 03/03/2020                   |
| 185.04_013       | RAPSON - MELD_185.04 | 14/04/2020                   |
| 185.04_014       | RAPSON - MELD_185.04 | 27/05/2020                   |
| 185.04_015       | RAPSON - MELD_185.04 | 01/06/2020                   |

Total patients enrolled at 11/03/2020: 10  
Total patients enrolled 11/03/2019-30/06/2019: 0  
Total patients enrolled 11/03/2020-30/06/2020: 3

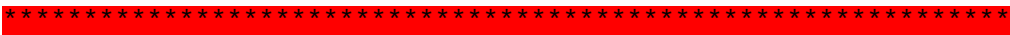

Study Name: IRST185.06 THRIP  
Protocol ID: THRIP  
Date: 2020-Oct-05  
Subjects: 2  
Study Event  
Definitions: 1  
Study Event  
Definition 2: Registration Confirmation E2  
REGISTRATION CONFIRMATION [THRIP] -  
CRF12: THRIP 0.1 C12



| Study Subject ID | Protocol ID         | RGCeLELIGIBILITY006_E2_C12 |
|------------------|---------------------|----------------------------|
| 185.06_001       | THRIP - MELD_185.06 | 30/10/2018                 |
| 185.06_002       | THRIP - MELD_185.06 | 06/09/2019                 |

Total patients enrolled at 11/03/2020: 2

Total patients enrolled 11/03/2019-30/06/2019: 0

Total patients enrolled 11/03/2020-30/06/2020: 0

\*\*\*\*\*

Study Name: IRST186.02 OLAPARIB

Protocol ID: OLAPARIB

Date: 2020-Oct-02

Subjects: 0

Study Event Definitions 0

| Study Subject ID | Protocol ID            | RGSpoLAPARIB010_E1_C1 |
|------------------|------------------------|-----------------------|
| 186.02_01_001    | OLAPARIB - MELD_186.02 | 11/09/2015            |
| 186.02_01_003    | OLAPARIB - MELD_186.02 | 17/09/2015            |
| 186.02_01_002    | OLAPARIB - MELD_186.02 | 17/09/2015            |
| 186.02_01_004    | OLAPARIB - MELD_186.02 | 01/10/2015            |
| 186.02_02_005    | OLAPARIB - NAPO_186.02 | 06/10/2015            |
| 186.02_01_006    | OLAPARIB - MELD_186.02 | 08/10/2015            |
| 186.02_01_007    | OLAPARIB - MELD_186.02 | 04/12/2015            |
| 186.02_02_008    | OLAPARIB - NAPO_186.02 | 06/09/2016            |
| 186.02_02_009    | OLAPARIB - NAPO_186.02 | 09/03/2017            |
| 186.02_01_010    | OLAPARIB - MELD_186.02 | 14/02/2018            |
| 186.02_01_011    | OLAPARIB - MELD_186.02 | 14/02/2018            |
| 186.02_01_012    | OLAPARIB - MELD_186.02 | 09/03/2018            |
| 186.02_01_013    | OLAPARIB - MELD_186.02 | 26/04/2018            |
| 186.02_01_014    | OLAPARIB - MELD_186.02 | 14/05/2018            |
| 186.02_01_016    | OLAPARIB - MELD_186.02 | 25/06/2018            |

|               |                        |            |
|---------------|------------------------|------------|
| 186.02_01_017 | OLAPARIB - MELD_186.02 | 20/09/2018 |
| 186.02_01_018 | OLAPARIB - MELD_186.02 | 07/11/2018 |
| 186.02_01_019 | OLAPARIB - MELD_186.02 | 18/02/2019 |

Total patients enrolled at 11/03/2020: 18

Total patients enrolled 11/03/2019-30/06/2019: 0

Total patients enrolled 11/03/2020-30/06/2020: 0

\*\*\*\*\*

Study Name: **IRST191.02 HBO-RT**

Protocol ID: HBO-RT

Date: 2020-Oct-05

Subjects: 13

Study Event

Definitions 1

Study Event

Definition 2 Registration Confirmation E2

REGISTRATION CONFIRMATION [HBO-RT] - HBO-

CRF7 RT 0.1 C7

| Study Subject ID | Protocol ID          | RGCeLELIGIBILITY006_E2_C7 |
|------------------|----------------------|---------------------------|
| 191.02_001       | HBO-RT - MELD_191.02 | 26/04/2018                |
| 191.02_002       | HBO-RT - MELD_191.02 | 04/05/2018                |
| 191.02_004       | HBO-RT - MELD_191.02 | 22/05/2018                |
| 191.02_003       | HBO-RT - MELD_191.02 | 23/05/2018                |
| 191.02_005       | HBO-RT - MELD_191.02 | 23/05/2018                |
| 191.02_006       | HBO-RT - MELD_191.02 | 25/06/2018                |
| 191.02_007       | HBO-RT - MELD_191.02 | 24/07/2018                |
| 191.02_008       | HBO-RT - MELD_191.02 | 22/08/2018                |
| 191.02_009       | HBO-RT - MELD_191.02 | 03/09/2018                |
| 191.02_010       | HBO-RT - MELD_191.02 | 28/09/2018                |

|            |                      |            |
|------------|----------------------|------------|
| 191.02_011 | HBO-RT - MELD_191.02 | 12/04/2019 |
| 191.02_012 | HBO-RT - MELD_191.02 | 23/08/2019 |
| 191.02_013 | HBO-RT - MELD_191.02 | 02/10/2019 |

Total patients enrolled at 11/03/2020: 13

Total patients enrolled 11/03/2019-30/06/2019: 1

Total patients enrolled 11/03/2020-30/06/2020: 0

\*\*\*\*\*

|              |                                  |    |
|--------------|----------------------------------|----|
| Study Name:  | IRST198.01 HIFU-BONE             |    |
| Protocol ID: | HIFU-BONE                        |    |
| Date:        | 2020-Oct-05                      |    |
| Subjects:    |                                  | 12 |
| Study Event  |                                  |    |
| Definitions  |                                  | 1  |
| Study Event  |                                  |    |
| Definition 1 | Registration                     | E1 |
|              | REGISTRATION [HIFU-BONE] - HIFU- |    |
| CRF1         | BONE 0.1                         | C1 |

| Study Subject ID | Protocol ID             | RGSeELEG003_E1_C1 |
|------------------|-------------------------|-------------------|
| 198.01_001       | HIFU-BONE - MELD_198.01 | 14/09/2015        |
| 198.01_002       | HIFU-BONE - MELD_198.01 | 22/12/2015        |
| 198.01_003       | HIFU-BONE - MELD_198.01 | 16/01/2016        |
| 198.01_004       | HIFU-BONE - MELD_198.01 | 27/01/2016        |
| 198.01_005       | HIFU-BONE - MELD_198.01 | 14/03/2016        |
| 198.01_006       | HIFU-BONE - MELD_198.01 | 30/03/2016        |
| 198.01_007       | HIFU-BONE - MELD_198.01 | 27/06/2016        |
| 198.01_008       | HIFU-BONE - MELD_198.01 | 12/12/2016        |
| 198.01_009       | HIFU-BONE - MELD_198.01 | 25/08/2017        |
| 198.01_010       | HIFU-BONE - MELD_198.01 | 26/09/2017        |

|            |                         |            |
|------------|-------------------------|------------|
| 198.01_011 | HIFU-BONE - MELD_198.01 | 28/03/2018 |
| 198.01_012 | HIFU-BONE - MELD_198.01 | 24/04/2018 |

Total patients enrolled at 11/03/2020: 12

Total patients enrolled 11/03/2019-30/06/2019: 0

Total patients enrolled 11/03/2020-30/06/2020: 0
