# Supplementary material
Source: PubMed Central journal article supplement (PMC8088061)
Supplement: 12874_2021_1291_MOESM2_ESM.pdf [file 12874_2021_1291_MOESM2_ESM.pdf]

**Supplementary Table S2.** Monitoring visits and Site Initiation Visits (SIV) during the “pandemic period 2020” (11/03-30/06) and the same period in 2019.

| Date of monitoring visit | Study                   |
|--------------------------|-------------------------|
| 15/03/2019               | IRST153.04 COREVAX      |
| 07/05/2019               | IRST191.02 HBO RT       |
| 24/05/2019               | IRST100.22 SENECA       |
| 27/05/2019               | IRST174.09 met-Heremyta |
| 04/06/2019               | IRST185.06 THRIP        |
| 10/06/2019               | IRST172.02 ABSIDE       |
| 01/04/2020               | IRST100.39 MESOVAX      |
| 23/04/2020               | BEATcc                  |
| 04/05/2020               | BEATcc                  |
| 13/05/2020               | IRST100.39 MESOVAX      |
| 29/05/2020               | IRST174.19 KENDO        |
| 03/06/2020               | IRST174.19 KENDO        |
| 09/06/2020               | IRST172.02 ABSIDE       |
| 16/06/2020               | IRST100.39 MESOVAX      |
| 22/06/2020               | BEATcc                  |
| 24/06/2020               | IRST172.02 ABSIDE       |
| 26/06/2020               | BEATcc                  |

| Date of SIV | Study             |
|-------------|-------------------|
| 11/03/2020  | IRST100.22 SENECA |
| 25/05/2020  | IRST185.04 RAPSON |
| 28/05/2020  | IRST185.04 RAPSON |
| 12/06/2020  | IRST185.04 RAPSON |
| 16/04/2020  | IRST185.04 RAPSON |
| 17/06/2020  | IRST185.04 RAPSON |
| 15/06/2020  | IRST185.04 RAPSON |
| 08/04/2020  | BEATcc            |
| 06/05/2020  | IRST100.22 SENECA |
| 20/05/2020  | BEATcc            |
| 29/05/2020  | BEATcc            |
| 26/06/2020  | IRST100.22 SENECA |
| 29/06/2020  | BEATcc            |
